# Supplementary material for: A Histone Deacetylase Adjusts Transcription Kinetics at Coding Sequences during Candida albicans Morphogenesis
Source: PubMed Central journal article supplement (PMC3516536; doi:10.1371/journal.pgen.1003118), 2012-12-06

Figure S7

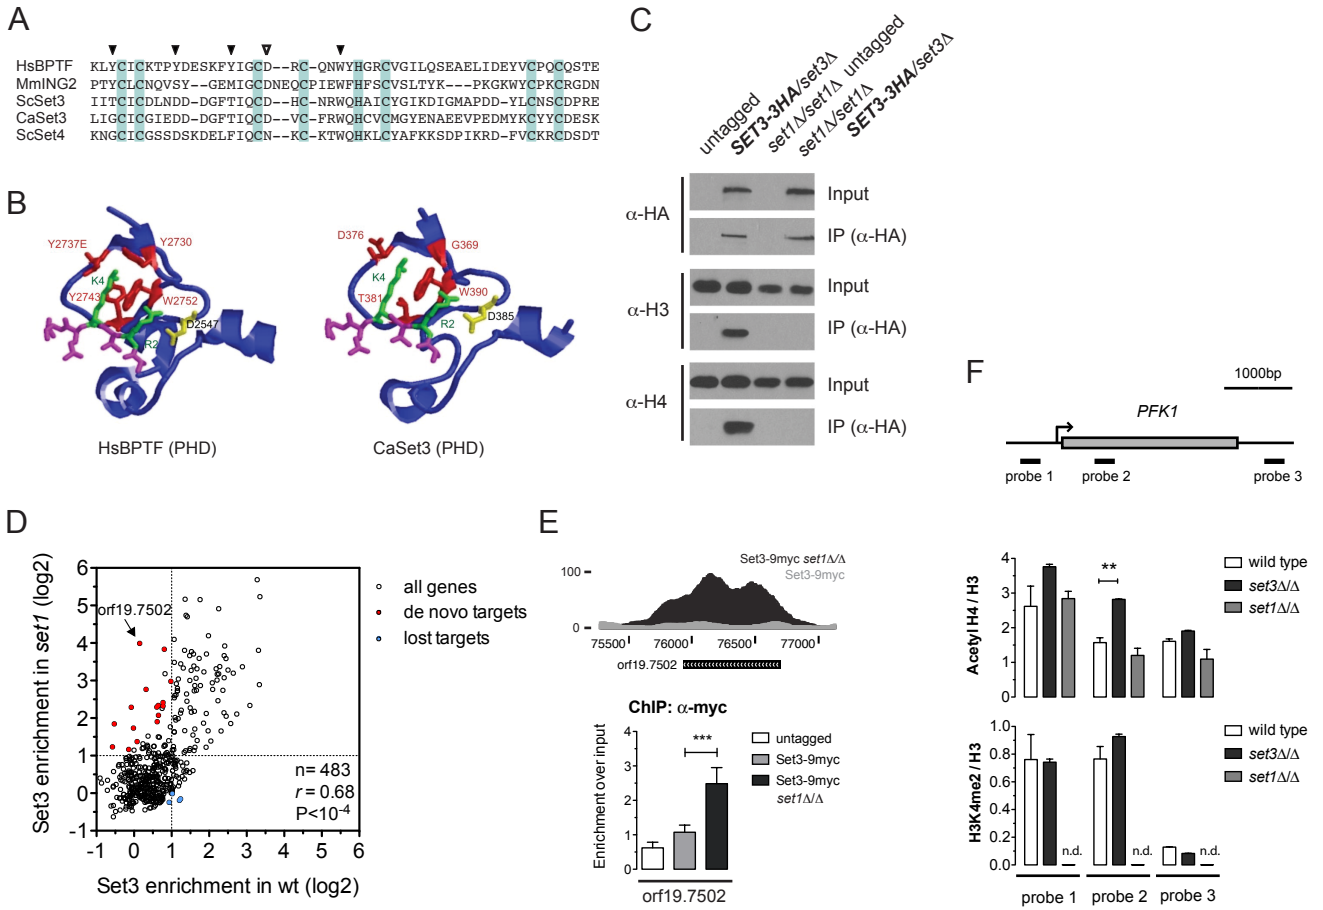

Supplement: pgen.1003118.s007.pdf [file pgen.1003118.s007.pdf]
